# Supplementary material for: PCA-Based Multiple-Trait GWAS Analysis: A Powerful Model for Exploring Pleiotropy
Source: PubMed Central journal article supplement (PMC6316348; doi:10.3390/ani8120239), 2018-12-17
Supplement: animals-08-00239-s001.pdf [file animals-08-00239-s001.pdf]

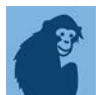

# Supplementary files: PCA-Based Multiple-Trait GWAS Analysis: A Powerful Model for Exploring Pleiotropy

Wengang Zhang <sup>1,†</sup>, Xue Gao <sup>1,†</sup>, Xinping Shi <sup>1,2</sup>, Bo Zhu <sup>1</sup>, Zezhao Wang <sup>1</sup>, Huijiang Gao <sup>1</sup>, Lingyang Xu <sup>1</sup>, Lupei Zhang <sup>1</sup>, Junya Li <sup>1,\*</sup> and Yan Chen <sup>1,\*</sup>

<sup>1</sup> Cattle Genetics and Breeding Group, Institute of Animal Science (IAS), Chinese Academy of Agricultural Sciences (CAAS), Beijing 100193, China; zhangwengang\_19@sina.com (W.Z.); gaouxue76@126.com (X.G.); sxp18811727129@163.com (X.S.); zhubo525@126.com (B.Z.); wangzezhao1@163.com (Z.W.); gaohj111@sina.com (H.G.); xulingyang@caas.cn (L.X.); zhanglupei@caas.cn (L.Z.)

<sup>2</sup> College of Animal Science and Technology, Hebei Agricultural University, Baoding 071000, China

\* Correspondence: lijunya@caas.cn (J.L.); chenyan0204@163.com (Y.C.);  
Tel.: +86-138-1156-8766 (J.L.); +86-134-3967-4745 (Y.C.)

† These authors contributed equally to this work.

Received: 30 August 2018; Accepted: 28 November 2018; Published: 30 November 2018

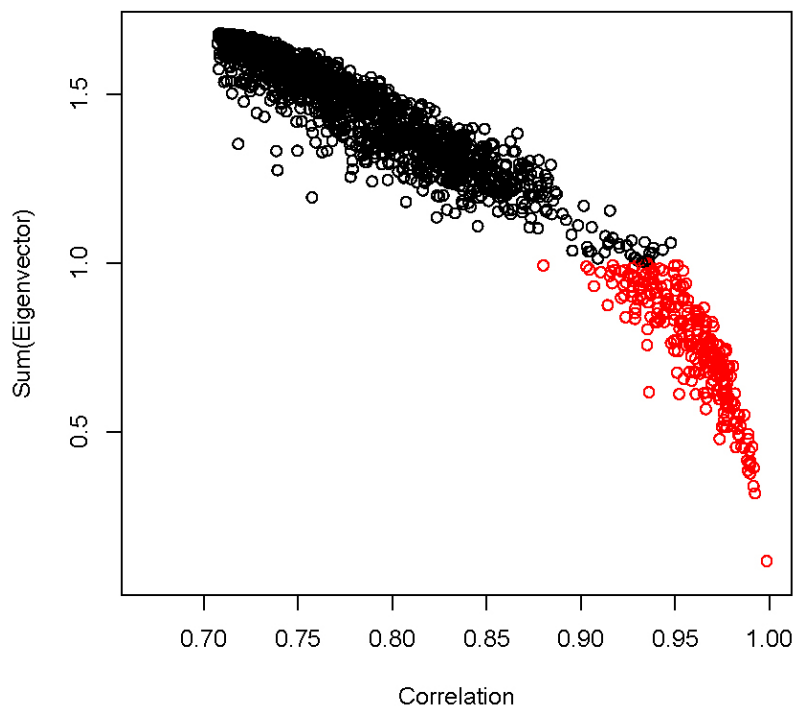

**Figure S1.** Summation of eigenvectors at different correlation levels based on summated data. Red plots represent that the summation of the eigenvector is lower than 1.

**Table S1.** Component matrix and total variance explained by each principal component.

| Trait                    | Principal Component |        |        |
|--------------------------|---------------------|--------|--------|
|                          | I                   | II     | III    |
| Clod weight              | 0.915               | 0.395  | 0.084  |
| Heel muscle shank weight | 0.928               | −0.279 | 0.247  |
| Fore shank weight        | 0.939               | −0.109 | −0.326 |
| Total variance explained | 86.0%               | 8.2%   | 5.8%   |

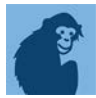

**Table S2.** Significant SNPs and candidate genes associated with three traits in single-trait GWAS.

| BTA | SNP name               | Position | p-Value                  | Annotated gene                       | Trait <sub>1</sub> |
|-----|------------------------|----------|--------------------------|--------------------------------------|--------------------|
| 6   | BovineHD0600010958     | 40003884 | 1.60 × 10 <sup>-7</sup>  |                                      | HMS                |
| 6   | BovineHD0600010960     | 40006739 | 1.60 × 10 <sup>-7</sup>  |                                      | HMS                |
| 5   | BovineHD0500008693     | 29684213 | 5.27 × 10 <sup>-7</sup>  | LARP4 FAM186A                        | HMS                |
| 6   | BovineHD0600010961     | 40007899 | 6.15 × 10 <sup>-7</sup>  |                                      | HMS                |
| 6   | BovineHD4100004580     | 38852093 | 6.56 × 10 <sup>-7</sup>  | DCAF16 NCAPG LCORL                   | HMS                |
| 6   | BovineHD0600011236     | 41498235 | 9.31 × 10 <sup>-7</sup>  | SLIT2                                | HMS                |
| 6   | BTA-75902-no-rs        | 42155077 | 1.22 × 10 <sup>-6</sup>  | KCNIP4                               | HMS                |
| 6   | BovineHD0600011439     | 42167429 | 2.17 × 10 <sup>-6</sup>  | KCNIP4                               | HMS                |
| 6   | BovineHD0600011438     | 42162209 | 2.21 × 10 <sup>-6</sup>  | KCNIP4                               | HMS                |
| 6   | BovineHD0600011442     | 42175002 | 2.49 × 10 <sup>-6</sup>  | KCNIP4                               | HMS                |
| 6   | BovineHD0600011441     | 42169746 | 2.64 × 10 <sup>-6</sup>  | KCNIP4                               | HMS                |
| 6   | BovineHD0600010952     | 39990876 | 2.78 × 10 <sup>-6</sup>  |                                      | HMS                |
| 6   | BovineHD0600011435     | 42154344 | 3.37 × 10 <sup>-6</sup>  | KCNIP4                               | HMS                |
| 6   | BovineHD0600010660     | 38549807 | 4.61 × 10 <sup>-6</sup>  | LAP3 MED28 FAM184B                   | HMS                |
| 6   | BovineHD0600010950     | 39988294 | 4.83 × 10 <sup>-6</sup>  |                                      | HMS                |
| 6   | BovineHD0600010951     | 39989868 | 5.06 × 10 <sup>-6</sup>  |                                      | HMS                |
| 6   | BovineHD0600010956     | 39997880 | 5.26 × 10 <sup>-6</sup>  |                                      | HMS                |
| 15  | BovineHD1500010212     | 37272475 | 5.90 × 10 <sup>-6</sup>  |                                      | HMS                |
| 6   | BovineHD0600010953     | 39991818 | 6.08 × 10 <sup>-6</sup>  |                                      | HMS                |
| 6   | BovineHD0600010827     | 39372172 | 6.27 × 10 <sup>-6</sup>  |                                      | HMS                |
| 6   | BovineHD0600011437     | 42158231 | 7.45 × 10 <sup>-6</sup>  | KCNIP4                               | HMS                |
| 6   | BovineHD0600011436     | 42156523 | 7.47 × 10 <sup>-6</sup>  | KCNIP4                               | HMS                |
| 6   | Hapmap26308-BTC-057761 | 38576012 | 9.41 × 10 <sup>-6</sup>  | LAP3 MED28 FAM184B                   | HMS                |
| 6   | BovineHD0600011226     | 41457949 | 9.75 × 10 <sup>-6</sup>  | SLIT2                                | HMS                |
| 4   | BovineHD0400013305     | 48381566 | 3.64 × 10 <sup>-10</sup> | PIK3CG PRKAR2B                       | CW                 |
| 4   | BovineHD0400013305     | 48381566 | 3.64 × 10 <sup>-6</sup>  | PIK3CG PRKAR2B                       | FS                 |
| 1   | BovineHD0100020542     | 71613561 | 8.25 × 10 <sup>-6</sup>  | TCTEX1D2 UBXN7 SMCO1 WDR53<br>FBXO45 | FS                 |

Note: <sup>1</sup> HMS, heel muscle weight; CW, clod weight. BTA, *Bos taurus* autosome. SNP, single nucleotide polymorphism.

**Table S3.** Significant SNPs and candidate genes associated with three traits in PCA-based multiple-trait GWAS.

| BTA | SNP name               | Position | p-Value                  | Gene               | PCA |
|-----|------------------------|----------|--------------------------|--------------------|-----|
| 4   | BovineHD0400013305     | 48381566 | 1.39 × 10 <sup>-11</sup> |                    | PC2 |
| 9   | BovineHD0900013932     | 50518738 | 3.28 × 10 <sup>-6</sup>  | MCHR2              | PC2 |
| 9   | BovineHD0900013931     | 50517026 | 5.06 × 10 <sup>-6</sup>  | MCHR2              | PC2 |
| 14  | BovineHD4100010732     | 5888713  | 7.85 × 10 <sup>-6</sup>  |                    | PC2 |
| 14  | BovineHD4100010731     | 5887202  | 8.17 × 10 <sup>-6</sup>  |                    | PC2 |
| 6   | BovineHD4100004565     | 38471732 | 7.55 × 10 <sup>-8</sup>  | LAP3               | PC3 |
| 6   | BovineHD4100004566     | 38477781 | 1.12 × 10 <sup>-7</sup>  | LAP3               | PC3 |
| 6   | Hapmap30134-BTC-034283 | 38464203 | 1.29 × 10 <sup>-7</sup>  |                    | PC3 |
| 6   | BovineHD0600010958     | 40003884 | 1.56 × 10 <sup>-7</sup>  |                    | PC3 |
| 6   | BovineHD0600010960     | 40006739 | 1.56 × 10 <sup>-7</sup>  |                    | PC3 |
| 6   | BovineHD0600010647     | 38469930 | 3.23 × 10 <sup>-7</sup>  |                    | PC3 |
| 6   | BovineHD0600010660     | 38549807 | 3.43 × 10 <sup>-7</sup>  |                    | PC3 |
| 6   | BovineHD0600010961     | 40007899 | 5.34 × 10 <sup>-7</sup>  |                    | PC3 |
| 6   | BovineHD0600010666     | 38574125 | 9.28 × 10 <sup>-7</sup>  | LAP3 MED28 FAM184B | PC3 |
| 6   | BovineHD0600010669     | 38583783 | 9.28 × 10 <sup>-7</sup>  | LAP3 MED28 FAM184B | PC3 |
| 6   | BovineHD0600010676     | 38595246 | 1.32 × 10 <sup>-6</sup>  | LAP3 MED28 FAM184B | PC3 |
| 6   | BovineHD0600010668     | 38581382 | 1.66 × 10 <sup>-6</sup>  | LAP3 MED28 FAM184B | PC3 |
| 6   | BovineHD0600010648     | 38471181 | 2.07 × 10 <sup>-6</sup>  | LAP3 MED28 FAM184B | PC3 |
| 6   | BovineHD0600010649     | 38474338 | 2.15 × 10 <sup>-6</sup>  |                    | PC3 |
| 6   | BovineHD0600010952     | 39990876 | 2.50 × 10 <sup>-6</sup>  |                    | PC3 |
| 6   | BovineHD0600010950     | 39988294 | 2.88 × 10 <sup>-6</sup>  |                    | PC3 |



|   |                    |          |                       |                    |     |
|---|--------------------|----------|-----------------------|--------------------|-----|
| 6 | BovineHD0600010951 | 39989868 | $3.10 \times 10^{-6}$ |                    | PC3 |
| 6 | BovineHD0600010953 | 39991818 | $3.22 \times 10^{-6}$ |                    | PC3 |
| 5 | BovineHD0500008693 | 29684213 | $3.42 \times 10^{-6}$ | LARP4 FAM186A      | PC3 |
| 6 | BovineHD0600010956 | 39997880 | $3.98 \times 10^{-6}$ |                    | PC3 |
| 6 | BovineHD4100004570 | 38494379 | $4.19 \times 10^{-6}$ |                    | PC3 |
| 6 | BovineHD0600010653 | 38495361 | $4.53 \times 10^{-6}$ | LAP3 MED28 FAM184B | PC3 |
| 6 | BovineHD0600010665 | 38571977 | $4.54 \times 10^{-6}$ | LAP3 MED28 FAM184B | PC3 |
| 6 | BovineHD0600010686 | 38618402 | $4.85 \times 10^{-6}$ | LAP3 MED28 FAM184B | PC3 |
| 6 | BovineHD4100004580 | 38852093 | $5.04 \times 10^{-6}$ | NCAPG LCORL DCAF16 | PC3 |
| 6 | BovineHD4100004568 | 38487018 | $5.29 \times 10^{-6}$ | LAP3               | PC3 |
| 6 | BTA-75902-no-rs    | 42155077 | $6.02 \times 10^{-6}$ | KCNIP4             | PC3 |
| 6 | BovineHD0600010824 | 39356766 | $6.26 \times 10^{-6}$ |                    | PC3 |
| 6 | BovineHD0600010957 | 40000025 | $9.01 \times 10^{-6}$ |                    | PC3 |
| 6 | BovineHD0600011439 | 42167429 | $9.57 \times 10^{-6}$ | KCNIP4             | PC3 |
| 6 | BovineHD0600011438 | 42162209 | $9.75 \times 10^{-6}$ | KCNIP4             | PC3 |
| 6 | BovineHD0600010684 | 38614787 | $9.76 \times 10^{-6}$ | LAP3 MED28 FAM184B | PC3 |

Note: BTA, *Bos taurus* autosome. SNP, single nucleotide polymorphism. PCA, principal component analysis.
